# Supplementary material
Source: publisher figshare collection journal article supplement (https://gsajournals.figshare.com/articles/dataset/_/11422590)
Supplement: Supplementary file 1 [file 1]

**Table S1. Markers and primers employed in this study.**

| Marker <sup>1</sup>    | Description                            | Primers (5' – 3')                                                                                    | Enzyme       |
|------------------------|----------------------------------------|------------------------------------------------------------------------------------------------------|--------------|
| CRAM – <i>ETF1</i>     | A <i>MAT</i> locus; PCR - RFLP         | Forward: JOHE24001/SS (TCCACAGACTCCCCCTCTC)<br>Reverse: JOHE24002/SS (TTTTCGCAACCTCTTCAACC)          | DdeI         |
| CRAM – <i>SXI2</i>     | B <i>MAT</i> locus; PCR – RFLP         | Forward: JOHE24748/SS (ACCAGATTATGGCAGACTGCT)<br>Reverse: JOHE24749/SS (AGGTTTGTCTCGGCTGGAGA)        | StyI         |
| CRAM – <i>NAD4</i>     | Mitochondrial; PCR – RFLP              | Forward: JOHE22508/SS (GGGAGAATTTGATTCAAGTGCAAC)<br>Reverse: JOHE22509/SS (ATGATGTTGCATCTGGCATCATAC) | XmnI         |
| CRAM – <i>NAD5</i>     | Mitochondrial; PCR – RFLP              | Forward: JOHE22510/SS (CTATTGGTGTTACAGGAGCTCAC)<br>Reverse: JOHE22511/SS (GAGCCTTCATACCTGCCTTATTGTC) | MboII        |
| CRNE – <i>STE20_Aα</i> | <i>MAT_Aα</i> specific; PCR (+/-)      | Forward: JOHE39203/SS (GGCTGCAATCACAGCACCTTAC)<br>Reverse: JOHE39204/SS (CTTCATGACATCACTCCCCTAT)     |              |
| CRNE – <i>STE20_Dα</i> | <i>MAT_Dα</i> specific; PCR (+/-)      | Forward: JOHE39207/SS (CTTAATTCACAGCACCAGCCTA)<br>Reverse: JOHE39208/SS (GGTCATCACAGTCAGTCACCAC)     |              |
| CRNE – <i>SXI2_Aa</i>  | <i>MAT_Aa</i> specific; PCR (+/-)      | Forward: JOHE39961/SS (CCAACAGAATGCGTCACCTC)<br>Reverse: JOHE39962/SS (TTACTCCGATCTCTGCCCAC)         |              |
| CRNE – <i>SXI1_Dα</i>  | <i>MAT_Dα</i> specific; PCR (+/-)      | Forward: JOHE17409/SS (GCCGTGCAAGGGTGTAGG)<br>Reverse: JOHE14895/SS (GGGCCATTGGAGGAAGCTG)            |              |
| CRNE – <i>NAD2</i>     | Mitochondrial; PCR - RFLP              | Forward: JOHE22520/SS (TATGATGGCCGTAGCGCTATC)<br>Reverse: JOHE22521/SS (TGGTGGTACTCCTGCCATTG)        | ScaI + PvuII |
| CRNE – <i>NAD5</i>     | Mitochondrial; PCR (size polymorphism) | Forward: JOHE22510/SS (CTATTGGTGTTACAGGAGCTCAC)<br>Reverse: JOHE22511/SS (GAGCCTTCATACCTGCCTTATTGTC) |              |

1: CRAM: markers analyzed for *C. amyloletus*; CRNE: markers analyzed for *C. neoformans*
