# Supplementary material
Source: publisher figshare collection journal article supplement (https://gsajournals.figshare.com/articles/dataset/_/11422590)
Supplement: Supplementary file 4 [file 1]

**Table S2. Genes tested for their effects on mito-UI in unilateral and bilateral crosses.**

| <b>Group</b>                                       | <b>Gene</b>  | <b>ID (in H99)</b> | <b>Strain (<i>MAT</i>)</b>                 | <b>Crosses</b> | <b>Backgrounds<sup>a</sup></b> |
|----------------------------------------------------|--------------|--------------------|--------------------------------------------|----------------|--------------------------------|
| Within the <i>MAT</i> locus                        | <i>SPO14</i> | CNAG_06812         | SSC927 ( $\alpha$ )<br>SSC937 ( <b>a</b> ) | Bilateral      | H-K                            |
|                                                    | <i>ETF1</i>  | CNAG_06806         | SSE720 ( $\alpha$ )<br>SSE693 ( <b>a</b> ) | Bilateral      | H-K                            |
|                                                    | <i>RUM1</i>  | CNAG_07411         | SSC919 ( $\alpha$ )<br>SSC938 ( <b>a</b> ) | Bilateral      | H-K                            |
|                                                    | <i>CAP1</i>  | CNAG_06813         | SSC929 ( $\alpha$ )<br>SSC940 ( <b>a</b> ) | Bilateral      | H-K                            |
|                                                    | <i>BSP1</i>  | CNAG_01457         | SSC939 ( $\alpha$ )<br>SSC941 ( <b>a</b> ) | Bilateral      | H-K                            |
|                                                    | <i>MYO2</i>  | CNAG_06971         |                                            | Unilateral     | H-A                            |
| Mitophagy related                                  | <i>ATG1</i>  | CNAG_05005         | SSH126 ( $\alpha$ )<br>SSH159 ( <b>a</b> ) | Bilateral      | H-K                            |
|                                                    | <i>ATG3</i>  | CNAG_06892         | SSG669 ( $\alpha$ )<br>SSH298 ( <b>a</b> ) | Bilateral      | H-K                            |
|                                                    | <i>ATG7</i>  | CNAG_04538         | SSG673 ( $\alpha$ )<br>SSH302 ( <b>a</b> ) | Bilateral      | H-K                            |
|                                                    | <i>ATG12</i> | CNAG_07645         | SSH129 ( $\alpha$ )<br>SSH153 ( <b>a</b> ) | Bilateral      | H-K                            |
|                                                    | <i>PTC6</i>  | CNAG_06418         | SSG923 ( $\alpha$ )<br>SSG930 ( <b>a</b> ) | Bilateral      | H-K                            |
|                                                    | <i>VPS1</i>  | CNAG_00565         | SSG926 ( $\alpha$ )<br>SSG909 ( <b>a</b> ) | Bilateral      | H-K                            |
| Involved in mitochondrial movement and segregation | <i>MMM1</i>  | CNAG_05557         | Ianiri and Idnurm, 2013                    | Unilateral     | H-A                            |
|                                                    | <i>MDM10</i> | CNAG_06345         | Ianiri and Idnurm, 2013                    | Unilateral     | H-A                            |
|                                                    | <i>MDM34</i> | CNAG_02304         | Ianiri and Idnurm, 2013                    | Unilateral     | H-A                            |

| Group | Gene        | ID (in H99) | Strain ( <i>MAT</i> ) | Crosses    | Backgrounds <sup>a</sup> |
|-------|-------------|-------------|-----------------------|------------|--------------------------|
|       | <i>RCV1</i> | CNAG_01983  | Jung et al., 2015     | Unilateral | H-B                      |
|       | <i>YPT7</i> | CNAG_02575  | Jung et al., 2015     | Unilateral | H-K                      |

<sup>a</sup>: The effects of mito-UIP are tested in crosses between H99 (*MAT* $\alpha$ , H) with *MATa* strains KN99a (K), Bt63a (B), or the *MATa* progeny derived from the diploid strain AI187 that inherited the deletion allele (A). All analyses were based on a minimum of 40 randomly dissected basidiospores.
