# Supplementary material
Source: publisher figshare collection journal article supplement (https://gsajournals.figshare.com/articles/dataset/_/11422590)

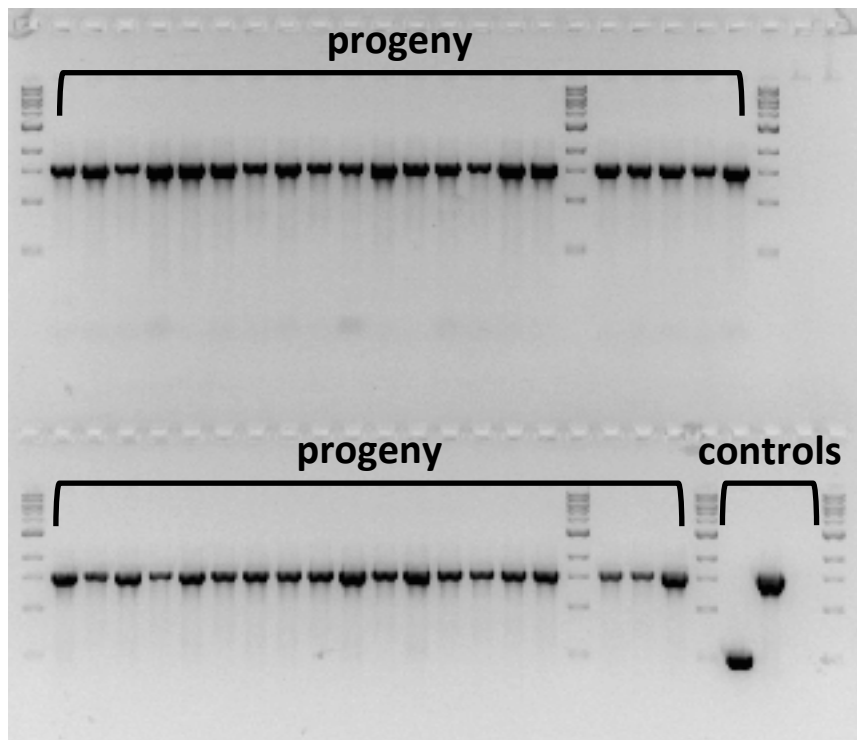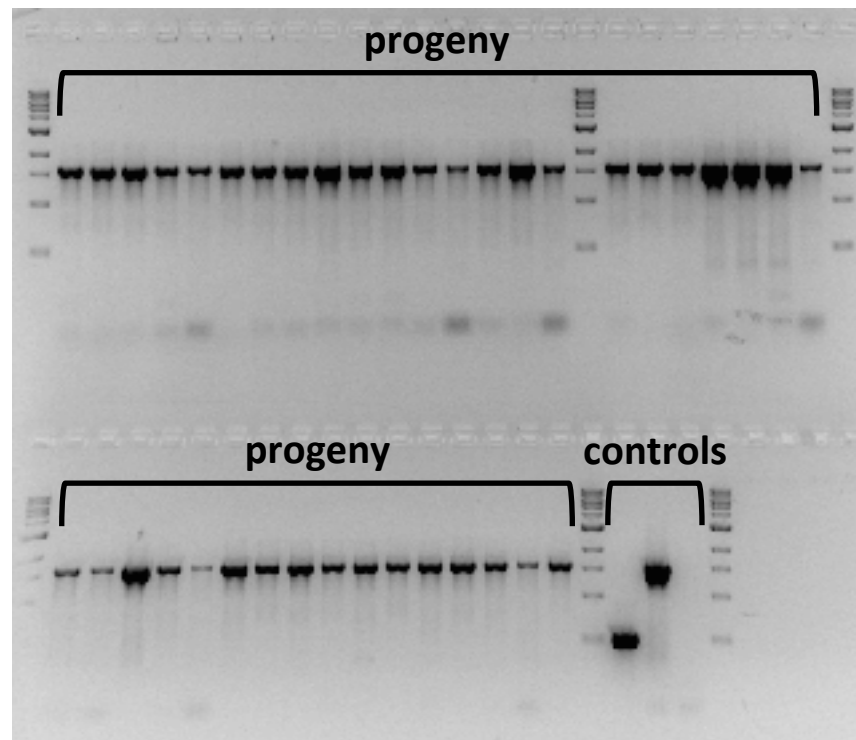

Supplement: Supplementary file 2 [file 1]

Figure S1

**A**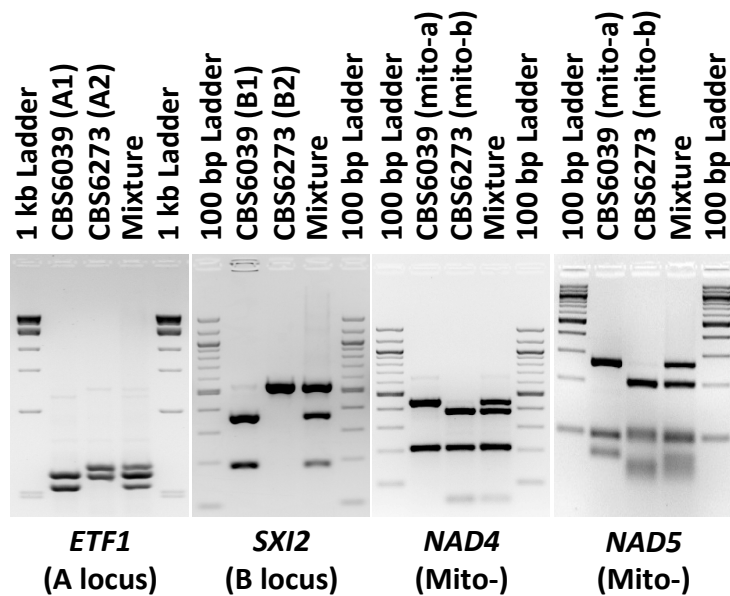**B**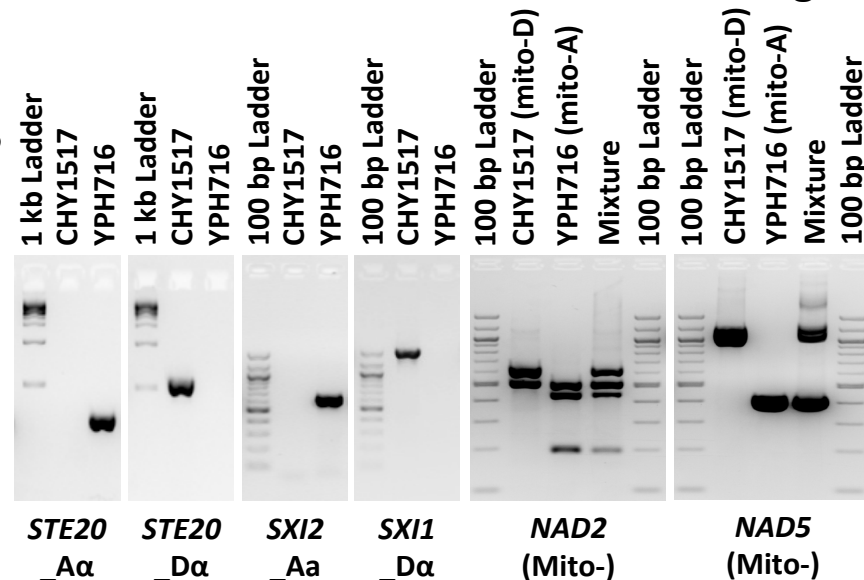**C**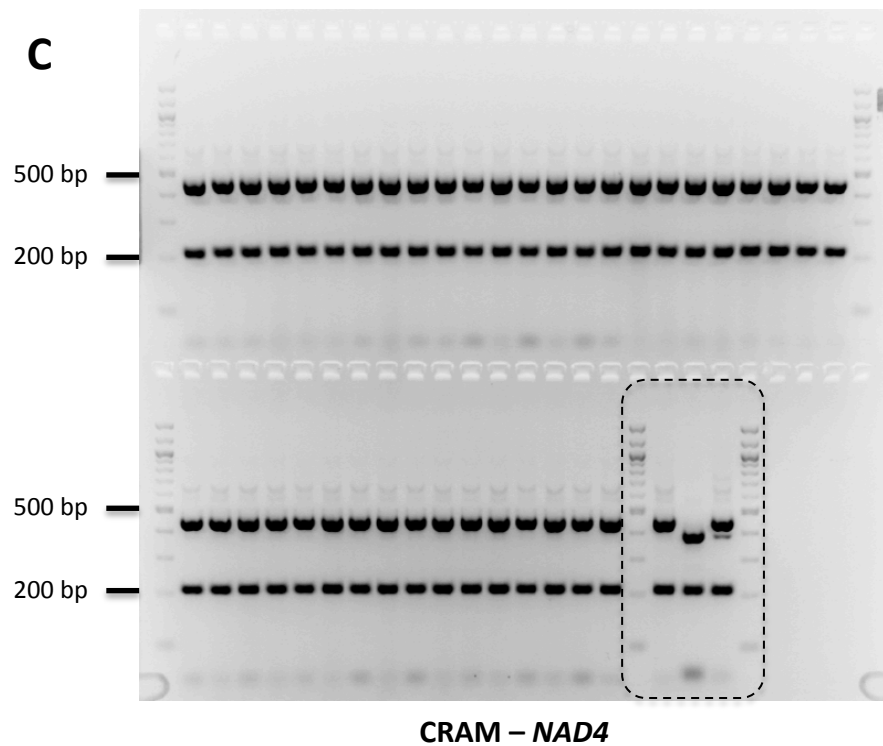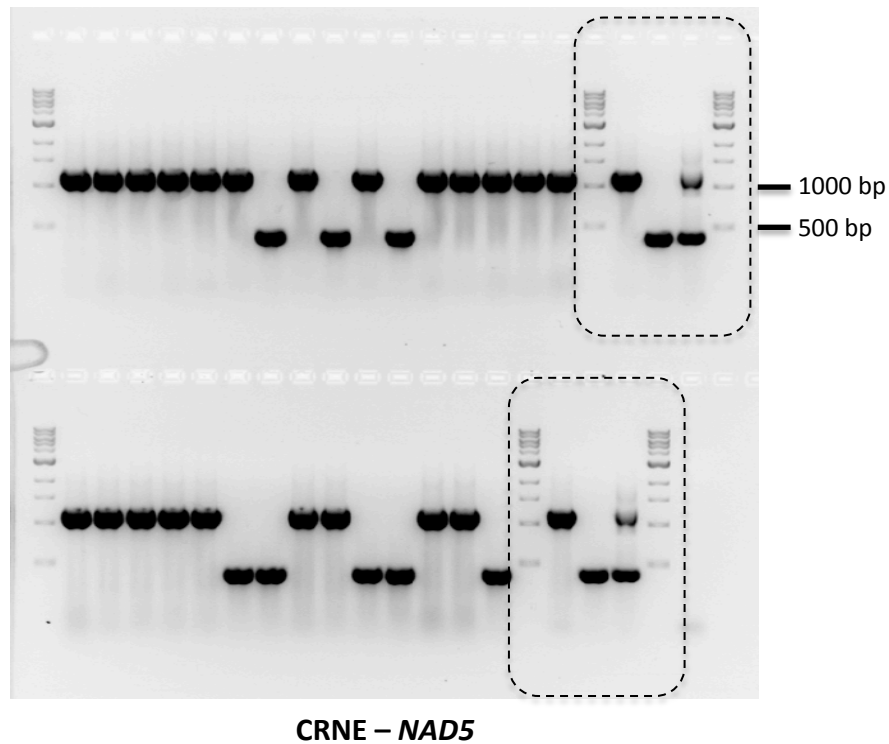

Supplement: Supplementary file 3 [file 1]
